# Supplementary material
Source: publisher figshare collection journal article supplement (https://acs.figshare.com/ndownloader/files/21601176)
Supplement: Supplementary file 1 [file 21601176]

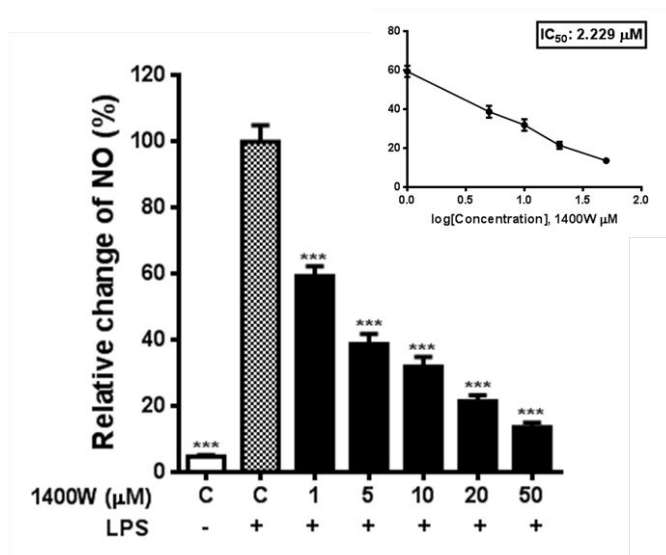

**Figure S1.** Effect of 1400W on nitric oxide production in LPS-induced SIM-A9 microglia.

Each bar represents the mean  $\pm$  SEM, \*\*\* $p < 0.001$ .

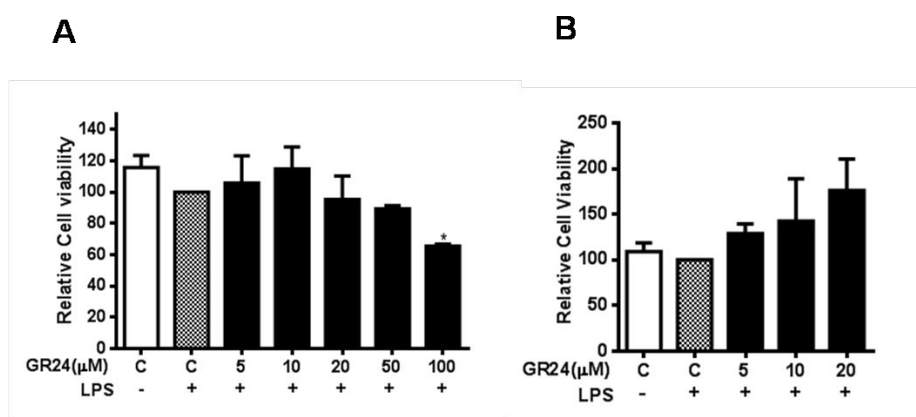

**Figure S2.** Effect of GR24 on cell viability in (A) SIM-A9 microglia and (B) bEnd.3 cells. C: Control.

Each bar represents the mean  $\pm$  SEM, \* $p < 0.02$ .
